# Supplementary material for: Single crystal ribbons and transistors of a solution processed sickle-like fused-ring thienoacene
Source: Royal Society of Chemistry journal article supplement (doi:10.1039/c0jm00963f), 2010-01-01

### Supplementary information: Single crystal ribbons and transistors of a solution processed sickle-like fused-ring thienoacene

Rongjin Li,<sup>a,b</sup> Huanli Dong,<sup>a</sup> Xiaowei Zhan,\*<sup>a</sup> Yudong He,<sup>a</sup> Hongxiang Li<sup>b</sup> and Wenping Hu\*<sup>a</sup>

<sup>a</sup> Beijing National Laboratory for Molecular Sciences, Key Laboratory of Organic Solids, Institute of Chemistry, Chinese Academy of Sciences, Beijing, P. R. China. E-mail: [xwzhan@iccas.ac.cn](mailto:xwzhan@iccas.ac.cn); [huwp@iccas.ac.cn](mailto:huwp@iccas.ac.cn)

<sup>b</sup> Shanghai Institute of Organic Chemistry, Chinese Academy of Sciences, Shanghai, P. R. China

Optical microscopic images of BBTT ribbons cast assembly on different substrates including glass, paper, quartz and plastic. The tendency to form ribbons is not sensitive to substrates.

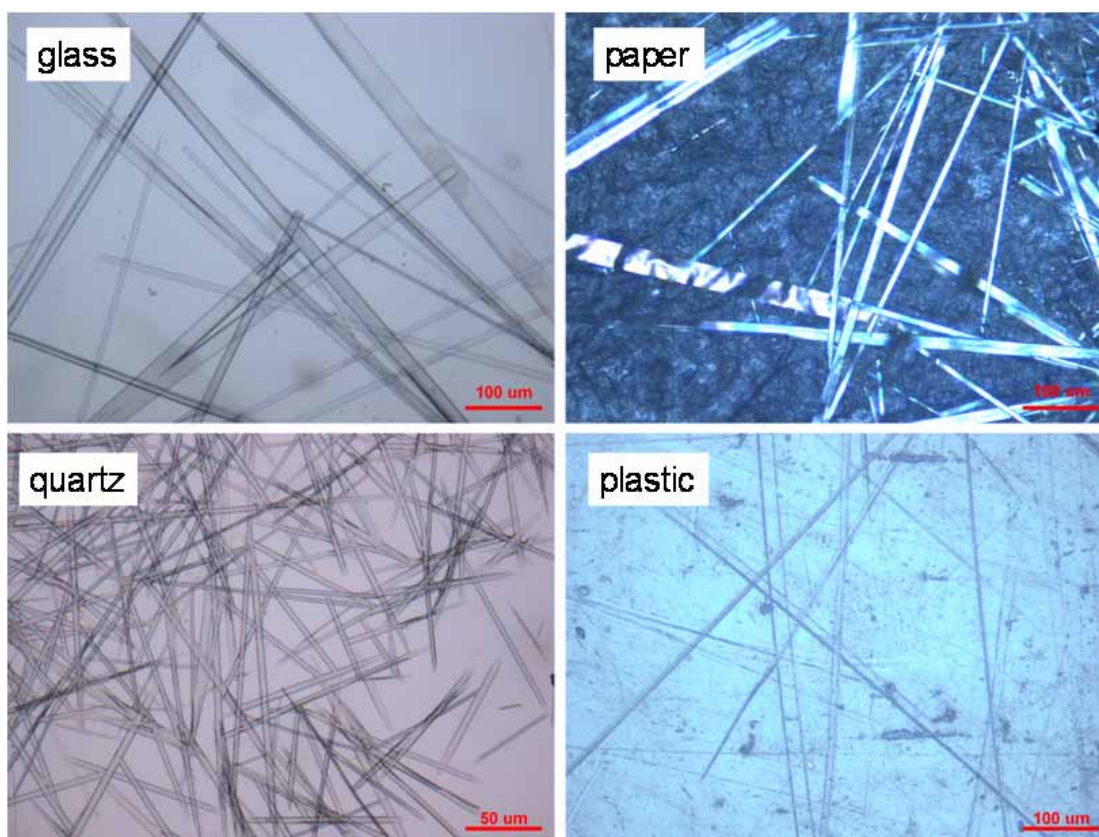

Supplement: c0jm00963f.pdf [file c0jm00963f.pdf]
